# Supplementary material
Source: MDPI journal article supplement (https://www.mdpi.com/search?q=sustainability-11-00893)
Supplement: s001 [file sustainability-11-00893-s001.pdf]

# Supplementary Materials

## Why we should empty Pandora's box to create a sustainable future: hope, sustainability and its implications for education

### Scales and measures

|                                      |
|--------------------------------------|
| Zukunftsszenarien (Future scenarios) |
|--------------------------------------|

|                                                                                                                                                                                                                                                                                                                                                                                                                                               | 1 = extremely<br>unlikely<br>–<br>10 = most likely | 1 = not at all<br>desirable<br>–<br>10 = highly desirable |
|-----------------------------------------------------------------------------------------------------------------------------------------------------------------------------------------------------------------------------------------------------------------------------------------------------------------------------------------------------------------------------------------------------------------------------------------------|----------------------------------------------------|-----------------------------------------------------------|
| <i>Digitalization and automatization (robots, artificial intelligence, and the like) make everyone's life much easier and offer groundbreaking solutions for the huge environment- and sustainability- related challenges of our times.</i>                                                                                                                                                                                                   | _____                                              | _____                                                     |
| <i>The response to the ever-increasing gap between the poor and the rich was a radical reorganization of the existing structures in the economy and society. This led to much better living conditions and a greater social cohesion.</i>                                                                                                                                                                                                     | _____                                              | _____                                                     |
| <i>The importance of climate change was recognized by all sectors of society. Curbing it has become top priority resulting in a stable Earth system.</i>                                                                                                                                                                                                                                                                                      | _____                                              | _____                                                     |
| <i>Climate change and its consequences could not be contained in time by an altering course in politics, business and individual behavior. This led to severe ecological crises and to massive economic declines as well as a severe decrease of quality of life for the majority of people.</i>                                                                                                                                              | _____                                              | _____                                                     |
| <i>The consequences of digitization and automation (unemployment of a large part of the population, people being excluded from the rapid technological development) could not be sufficiently mitigated globally and nationally. This significantly deepened existing social inequalities and created new ones. The consequence being that extreme inequalities of the quality of life even exist among people within the same countries.</i> | _____                                              | _____                                                     |

*The growing social inequality as well as the still prevailing poverty of certain parts of the world's population could not be restrained. This resulted in the instability of states, nations and institutions and that almost everyone's individual daily life became less secure and harsher.*

### Verantwortungsübernahme NE (Agency)

| <i>Es liegt NICHT in meiner Verantwortung, mich für nachhaltige Entwicklung einzusetzen, weil...</i>                 | stimme<br>über-<br>haupt<br>nicht zu | stimme<br>nicht<br>zu    | teils-<br>teils          | stimme<br>zu             | stimme<br>voll<br>und<br>ganz<br>zu |
|----------------------------------------------------------------------------------------------------------------------|--------------------------------------|--------------------------|--------------------------|--------------------------|-------------------------------------|
| <i>...der Einzelne sowieso nichts ändern kann.</i>                                                                   | <input type="checkbox"/>             | <input type="checkbox"/> | <input type="checkbox"/> | <input type="checkbox"/> | <input type="checkbox"/>            |
| <i>...die Verantwortung dafür hauptsächlich bei den kommenden Generationen liegt.</i>                                | <input type="checkbox"/>             | <input type="checkbox"/> | <input type="checkbox"/> | <input type="checkbox"/> | <input type="checkbox"/>            |
| <i>...die anderen Industrienationen auch erst mal aktiv werden müssen.</i>                                           | <input type="checkbox"/>             | <input type="checkbox"/> | <input type="checkbox"/> | <input type="checkbox"/> | <input type="checkbox"/>            |
| <i>...es nutzlos ist, da die Regierungen und die Industrie die ganze Macht haben und tun können, was sie wollen.</i> | <input type="checkbox"/>             | <input type="checkbox"/> | <input type="checkbox"/> | <input type="checkbox"/> | <input type="checkbox"/>            |
| <i>...Wissenschaft und Technik die Umweltprobleme lösen werden, ohne dass wir unsere Lebensweise ändern müssen.</i>  | <input type="checkbox"/>             | <input type="checkbox"/> | <input type="checkbox"/> | <input type="checkbox"/> | <input type="checkbox"/>            |

### Emotionen (Emotions regarding SD)

|                                                                                                                                                                         | stimme<br>über-<br>haupt<br>nicht zu | stimme<br>nicht<br>zu    | teils-<br>teils          | stimme<br>zu             | stimme<br>voll<br>und<br>ganz<br>zu |
|-------------------------------------------------------------------------------------------------------------------------------------------------------------------------|--------------------------------------|--------------------------|--------------------------|--------------------------|-------------------------------------|
| <i>Ich ärgere mich, wenn sich andere Menschen keine Gedanken über die langfristigen Folgen ihres Verhaltens für andere Menschen und zukünftige Generationen machen.</i> | <input type="checkbox"/>             | <input type="checkbox"/> | <input type="checkbox"/> | <input type="checkbox"/> | <input type="checkbox"/>            |
| <i>Ich bewundere Menschen, die sich ehrenamtlich für andere Menschen oder die Natur engagieren.</i>                                                                     | <input type="checkbox"/>             | <input type="checkbox"/> | <input type="checkbox"/> | <input type="checkbox"/> | <input type="checkbox"/>            |
| <i>Ich ärgere mich, wenn es durch nachhaltigkeitsbezogene Maßnahmen zu Einbußen im Lebensstandard kommt.</i>                                                            | <input type="checkbox"/>             | <input type="checkbox"/> | <input type="checkbox"/> | <input type="checkbox"/> | <input type="checkbox"/>            |

|                                                                                                                                                                           |                          |                          |                          |                          |                          |
|---------------------------------------------------------------------------------------------------------------------------------------------------------------------------|--------------------------|--------------------------|--------------------------|--------------------------|--------------------------|
| Wenn ich mich (z.B. beim Konsum) verschwenderisch und ohne Bedenken sozialer Standards verhalte, habe ich im Anschluss Schuldgefühle.                                     | <input type="checkbox"/> |
| Ich fühle mich stolz, wenn ich mich nachhaltigkeitsbewusst verhalten habe.                                                                                                | <input type="checkbox"/> |
| Es besorgt mich zu sehen, wie nachlässig wir mit der Natur umgehen und wie viel Ungerechtigkeit in der Welt herrscht.                                                     | <input type="checkbox"/> |
| Ich ärgere mich, wenn Deutschland durch die strengen Gesetze zur nachhaltigen Entwicklung (z.B. Gesetze zum Umweltschutz) im internationalen Vergleich benachteiligt ist. | <input type="checkbox"/> |

|                                     |
|-------------------------------------|
| NE Verhalten (Sustainable behavior) |
|-------------------------------------|

|                                                                                                                                       | nie                      | selten                   | manchmal                 | oft                      | stets                    |
|---------------------------------------------------------------------------------------------------------------------------------------|--------------------------|--------------------------|--------------------------|--------------------------|--------------------------|
| <b>Innerhalb dieses Jahres habe ich...</b>                                                                                            |                          |                          |                          |                          |                          |
| ... mich gezielt über Nachhaltigkeitsthemen informiert                                                                                | <input type="checkbox"/> |
| ... andere über soziale Medien für das Thema Nachhaltigkeit sensibilisiert                                                            | <input type="checkbox"/> |
| ... mein eigenes Verhalten im Alltag nach seinen Auswirkungen auf andere Menschen und die Umwelt hinterfragt                          | <input type="checkbox"/> |
| ... Energie gespart (Licht, Heizung, Warmwasser)                                                                                      | <input type="checkbox"/> |
| ... Strecken lieber mit den öffentlichen Verkehrsmitteln, dem Fahrrad oder zu Fuß zurückgelegt als z.B. mit dem Auto                  | <input type="checkbox"/> |
| ... nachhaltig konsumiert (z.B. auf biologischen Anbau, fairen Handel, regionale Produktion geachtet; meinen Fleischkonsum reduziert) | <input type="checkbox"/> |
| ... mich in einer Gruppe / Organisation engagiert, die sich für nachhaltige Entwicklung einsetzt.                                     | <input type="checkbox"/> |
|                                                                                                                                       | nie                      | selten                   | manchmal                 | oft                      | stets                    |
| <b>Innerhalb des letzten Jahres habe ich...</b>                                                                                       |                          |                          |                          |                          |                          |
| ... Flugreisen unternommen.                                                                                                           | <input type="checkbox"/> |
| ... Bank- und Finanzgeschäfte nach ökologischen und sozialen Prinzipien ausgerichtet.                                                 | <input type="checkbox"/> |

|                                                                              |                          |                          |                          |                          |                          |
|------------------------------------------------------------------------------|--------------------------|--------------------------|--------------------------|--------------------------|--------------------------|
| ... zu Hause Ökostrom anstatt konventionellem Strom bezogen.                 | <input type="checkbox"/> |
| ... Geld zur Unterstützung von nachhaltigkeitsbezogenen Projekten gespendet. | <input type="checkbox"/> |

|                                                                      |
|----------------------------------------------------------------------|
| Persönliche Hürden (Personal hurdles regarding sustainable behavior) |
|----------------------------------------------------------------------|

| Was hält Sie persönlich davon ab, sich im Alltag nachhaltiger zu verhalten?                                                                                         | stimme überhaupt nicht zu | stimme nicht zu          | teils-teils              | stimme zu                | stimme voll und ganz zu  |
|---------------------------------------------------------------------------------------------------------------------------------------------------------------------|---------------------------|--------------------------|--------------------------|--------------------------|--------------------------|
| <i>Ich weiß darüber nicht genug.</i>                                                                                                                                | <input type="checkbox"/>  | <input type="checkbox"/> | <input type="checkbox"/> | <input type="checkbox"/> | <input type="checkbox"/> |
| <i>Ich müsste zu viele Abstriche bezogen auf meine Lebensqualität machen.</i>                                                                                       | <input type="checkbox"/>  | <input type="checkbox"/> | <input type="checkbox"/> | <input type="checkbox"/> | <input type="checkbox"/> |
| <i>Finanzielle Gründe.</i>                                                                                                                                          | <input type="checkbox"/>  | <input type="checkbox"/> | <input type="checkbox"/> | <input type="checkbox"/> | <input type="checkbox"/> |
| <i>Die Voraussetzungen dafür sind in meinem Alltag nicht gegeben (wie z.B. Geschäfte mit nachhaltigen Produkten, gut ausgebauter öffentlicher Nahverkehr etc.).</i> | <input type="checkbox"/>  | <input type="checkbox"/> | <input type="checkbox"/> | <input type="checkbox"/> | <input type="checkbox"/> |
| <i>Ich sehe keine Notwendigkeit dazu, mich nachhaltiger zu verhalten<br/>(Nachhaltigkeitsprobleme sind aus meiner Sicht nicht so gravierend).</i>                   | <input type="checkbox"/>  | <input type="checkbox"/> | <input type="checkbox"/> | <input type="checkbox"/> | <input type="checkbox"/> |
| <i>Ich sehe da keinen Zusammenhang<br/>(die Lösung von Nachhaltigkeitsproblemen hängt nicht von meinem Lebensstil ab).</i>                                          | <input type="checkbox"/>  | <input type="checkbox"/> | <input type="checkbox"/> | <input type="checkbox"/> | <input type="checkbox"/> |
| <i>Ich lebe bereits sehr nachhaltigkeitsorientiert.</i>                                                                                                             | <input type="checkbox"/>  | <input type="checkbox"/> | <input type="checkbox"/> | <input type="checkbox"/> | <input type="checkbox"/> |

|                                                  |
|--------------------------------------------------|
| BNE Implementierung (Desired ESD implementation) |
|--------------------------------------------------|

| In meinem Unterricht...                                                                                                             |                             | nie                      | selten                   | manchmal                 | oft                      | sehr oft                 |
|-------------------------------------------------------------------------------------------------------------------------------------|-----------------------------|--------------------------|--------------------------|--------------------------|--------------------------|--------------------------|
| ... betrachten wir bei der Auseinandersetzung mit aktuellen Problemen die Verbindung zwischen Vergangenheit, Gegenwart und Zukunft. | <i>In Zukunft gewünscht</i> | <input type="checkbox"/> |

|                                                                                                                     |                             |                          |                          |                          |                          |                          |
|---------------------------------------------------------------------------------------------------------------------|-----------------------------|--------------------------|--------------------------|--------------------------|--------------------------|--------------------------|
| <i>... betrachten wir lokale und globale Probleme sowie deren Verbindung.</i>                                       | <i>in Zukunft gewünscht</i> | <input type="checkbox"/> |
| <i>... betrachten wir die Zusammenhänge zwischen ökonomischen, sozialen und umweltbezogenen Problemen.</i>          | <i>In Zukunft gewünscht</i> | <input type="checkbox"/> |
| <i>... kommen bei Diskussionen viele verschiedene Perspektiven auf.</i>                                             | <i>In Zukunft gewünscht</i> | <input type="checkbox"/> |
| <i>... reflektieren wir beim Lesen von Texten die Inhalte kritisch.</i>                                             | <i>In Zukunft gewünscht</i> | <input type="checkbox"/> |
| <i>... werden wir ermutigt, uns eine eigene Meinung zu bilden und diese zu vertreten.</i>                           | <i>In Zukunft gewünscht</i> | <input type="checkbox"/> |
| <i>... können wir entscheiden, womit wir uns beschäftigen. Wir werden lediglich von der Lehrperson unterstützt.</i> | <i>In Zukunft gewünscht</i> | <input type="checkbox"/> |

#### **In school...**

|                                                                                                                |                              | <b>never</b>             | <b>rare</b>              | <b>sometimes</b>         | <b>often</b>             | <b>very often</b>        |
|----------------------------------------------------------------------------------------------------------------|------------------------------|--------------------------|--------------------------|--------------------------|--------------------------|--------------------------|
| <i>... we look at the connections between the past, the present, and the future as regards various issues.</i> | <i>desired in the future</i> | <input type="checkbox"/> |
| <i>... we look at both local and global problems and the connections between them.</i>                         | <i>desired in the future</i> | <input type="checkbox"/> |
| <i>... we look at how economics, social issues, and environmental problems are connected.</i>                  | <i>desired in the future</i> | <input type="checkbox"/> |
| <i>When we have class discussions, it is possible for many different views to emerge.</i>                      | <i>desired in the future</i> | <input type="checkbox"/> |
| <i>When we read texts in school, we usually take a critical look at the content.</i>                           | <i>desired in the future</i> | <input type="checkbox"/> |

*In school, we are encouraged to take a stand and have our own opinions on the issues at hand.*

*Desired in the future*

☐ ☐ ☐ ☐ ☐

*We decide what we study, with support of the teacher.*

*desired in the future*

☐ ☐ ☐ ☐ ☐

|                                                    |
|----------------------------------------------------|
| <p>Soziale Erwünschtheit (social desirability)</p> |
|----------------------------------------------------|

| Was würden Sie sagen: Inwieweit trifft der jeweilige Satz auf Sie persönlich zu?    | stimme überhaupt nicht zu | stimme eher nicht zu     | stimme eher zu           | stimme voll und ganz zu  |
|-------------------------------------------------------------------------------------|---------------------------|--------------------------|--------------------------|--------------------------|
| <i>Mein erster Eindruck von Menschen stellt sich gewöhnlich als richtig heraus.</i> | <input type="checkbox"/>  | <input type="checkbox"/> | <input type="checkbox"/> | <input type="checkbox"/> |
| <i>Ich bin mir oft unsicher in meinem Urteil.</i>                                   | <input type="checkbox"/>  | <input type="checkbox"/> | <input type="checkbox"/> | <input type="checkbox"/> |
| <i>Ich weiß immer genau, wieso ich etwas mag.</i>                                   | <input type="checkbox"/>  | <input type="checkbox"/> | <input type="checkbox"/> | <input type="checkbox"/> |
| <i>Ich habe schon mal zu viel Wechselgeld zurückbekommen und nichts gesagt.</i>     | <input type="checkbox"/>  | <input type="checkbox"/> | <input type="checkbox"/> | <input type="checkbox"/> |
| <i>Ich bin immer ehrlich zu anderen.</i>                                            | <input type="checkbox"/>  | <input type="checkbox"/> | <input type="checkbox"/> | <input type="checkbox"/> |
| <i>Ich habe gelegentlich mal jemanden ausgenutzt.</i>                               | <input type="checkbox"/>  | <input type="checkbox"/> | <input type="checkbox"/> | <input type="checkbox"/> |
